# 1 A hierarchical approach to model 2 decision making: a study in 3 chemotactic behavior of *Escherichia* 4 *coli*

5 Safar Vafadar<sup>1</sup>, Kaveh Kavousi<sup>1</sup>, Hadiseh Safdari<sup>2</sup>, Ata Kalirad<sup>2</sup>, Mehdi Sadeghi<sup>2,3\*</sup>

\*For correspondence:  
[sadeghi@nigeb.ac.ir](mailto:sadeghi@nigeb.ac.ir) (MS)

6 <sup>1</sup>Laboratory of Biological Complex Systems and Bioinformatics (CBB), Institute of  
7 Biochemistry and Biophysics, University of Tehran, Tehran, Iran; <sup>2</sup>School of Biological  
8 Science, Institute for Research in Fundamental Sciences (IPM), Tehran, Iran; <sup>3</sup>National  
9 Institute of Genetic Engineering and Biotechnology (NIGEB), Tehran, Iran

---

11 **Abstract** Reducing the complex behavior of living entities to its underlying physical and chemical  
12 processes is a formidable task in biology. Complex behaviors can be characterized as decision  
13 making: the ability to process the incoming information via an intracellular network and act upon  
14 this information to choose appropriate strategies. Motility is one such behavior that has been the  
15 focus many modeling efforts in the past. Our aim is to reduce the chemotactic behavior in *E. coli* to  
16 its molecular constituents in order to paint a comprehensive and end-to-end picture of this  
17 intricate behavior. We utilize a hierarchical approach, consisting of three layers, to achieve this goal:  
18 at the first level, chemical reactions involved in chemotaxis are simulated. In the second level, the  
19 chemical reactions give rise to the mechanical movement of six independent flagella. At the last  
20 layer, the two lower layers are combined to allow a digital bacterium to receive information from its  
21 environment and swim through it with verve. Our results are in concert with the experimental  
22 studies concerning the motility of *E. coli* cells. In addition, we show that our detailed model of  
23 chemotaxis is reducible to a non-homogeneous Markov process.

---

## 25 Introduction

26 Decision making is defined as choosing a course of action from a set of possibilities (*Kitajima and*  
27 *Toyota, 2013*). Biological systems have to cope with both internal and external perturbations and  
28 make the “right” decisions amidst this pandemonium. The decision-making machinery is shaped by  
29 natural selection to fit the conditions of its environment (*Tagkopoulos et al., 2008; Mitchell et al.,*  
30 *2009*). Motility can be viewed as a decision-making process that benefits the living cell by enabling  
31 it to find resources in its niche more efficiently (*Xie and Wu, 2014*). Cell motility requires sensors  
32 to monitor the environment, actuators to act upon the incoming information, and an network to  
33 process that information.

34  
35 The majority of bacteria are motile, swimming being its most common form (*Jarrell and McBride,*  
36 *2008; Lauga, 2016*). Early studies revealed a substantial amount of variation in motility of clonal  
37 cells as they navigate a uniform environment (*Dufour et al., 2016*). In a homogeneous environment  
38 with uniformly-distributed resources, all decisions apropos of motility would be equally likely to be  
39 taken -i.e., *random walk*. Consequently in such circumstances, a motile cell would randomly navigate

40 the environment. Having encountered a non-uniform distribution of resources in the environment,  
41 a motile cell will move to more resource-rich areas - i.e., the default *random walk* turns into *biased*  
42 *random walk*.

43  
44 Chemotaxis, the ability of bacterial cells to sense chemical cues in their environment and move  
45 accordingly, predates the divergence of the eubacteria from the archaeobacteria (**Woese and Fox,**  
46 **1977**). The steps taken in chemotactic behavior, to seek attractants and avoid repellents, can be  
47 seen as a chain of biased random steps. To illustrate this point, we can focus on *Escherichia coli*. *E.*  
48 *coli* detects the concentration of chemoattractants in its vicinity via an array of sensors, processes  
49 the sensory data via a sensory network, and swims accordingly using its flagella (**Sourjik and**  
50 **Wingreen, 2012; Frankel et al., 2014**). Following a trail of chemoattractants to get to their source is  
51 seemingly an insurmountable obstacle for *E. coli*, since their small size means that the difference  
52 between the amount of chemoattractants around its head and its tail would not be meaningful, and,  
53 consequently, useless in finding the correct direction. In reality, by rotating its flagella clockwise  
54 (CW) or counter clockwise (CCW), *E. coli* runs and tumbles through the environment (**Wadhams and**  
55 **Armitage, 2004; Shimizu et al., 2010**).

56  
57 Many mathematical models have been developed to understand the bacterial chemotaxis  
58 (reviewed in (**Tindall et al., 2008**)). The early models focused on the adaptive behavior of individual  
59 bacteria in different environmental conditions at a macroscopic level (**Segel, 1976; Spudich and**  
60 **Koshland Jr, 1976; Block et al., 1982, 1983**). Some models (e.g., **Goldbeter and Koshland Jr (1982)**),  
61 used ordinary differential equations to describe the bacterial response to a gradient of chemical  
62 stimulants. Some used the Ising model (**Shi and Duke, 1998; Duke and Bray, 1999; Shi, 2000, 2001,**  
63 **2002; Guo and Levine, 1999, 2000**), others utilized an individual-based approach (**Frankel et al.,**  
64 **2014; Niu et al., 2013**), and some emphasized the hydrodynamic aspects of swimming (**Elgeti et al.,**  
65 **2015**) and the role of drift versus diffusion (**Chatterjee et al., 2011**).

66  
67 Most theoretical models of chemotaxis are limited to incorporating a single motor or simply  
68 assume that all cells have a single flagellum (**Bray et al., 2007; Kalinin et al., 2009; Matthäus**  
69 **et al., 2009; Jiang et al., 2010; Flores et al., 2012; Kanehl and Ishikawa, 2014**). Constructing a  
70 comprehensive model of bacterial chemotaxis from the single-flagellum state has remained out of  
71 reach (**Mears et al., 2014**). What is more, most models do not explain how macroscopic chemotaxis  
72 behavior arises from the fundamental laws of chemistry and physics. In this paper, we propose a  
73 model that reduce chemotaxis to simple phenomena.

74  
75 In our **Stochastic Multi-Layer (SML)** model, *E. coli* is treated like a minute biological submarine.  
76 This nano-submarine is propelled by an average of six flagella in low Reynolds' number regime.  
77 Our model attempts to offer a comprehensive description of chemotactic behavior in *E. coli* by  
78 breaking this complex process into three levels. In the first level, chemoattractants react with the  
79 receptors, causing molecular events in the cell that can result in the rotation of each flagellum.  
80 The sensory network determines the direction and rotation rate of each flagellum. In the second  
81 level, each flagellum generates a force and the resultant force of all flagella causes the *E. coli* to  
82 move in the direction of this force. In the third level, the combination of different force vectors  
83 of each flagellum provides a range of direction and length of movement in each step - i.e., the  
84 behavior of the bacterium emerges from the chemical and the physical levels. At each step, as  
85 the concentration of chemoattractants sensed by the bacteria changes, so does the distribution of  
86 probability of all choices, i.e., the direction and the distance of travel at that step.

87  
88 This hierarchical stochastic model is designed to model biochemical processes of chemotaxis  
89 within individual cells and the associated motion of cells within a 2D environment. This model can  
90 paint an *end-to-end* picture of chemotaxis and reveal its underpinning molecular mechanisms. In

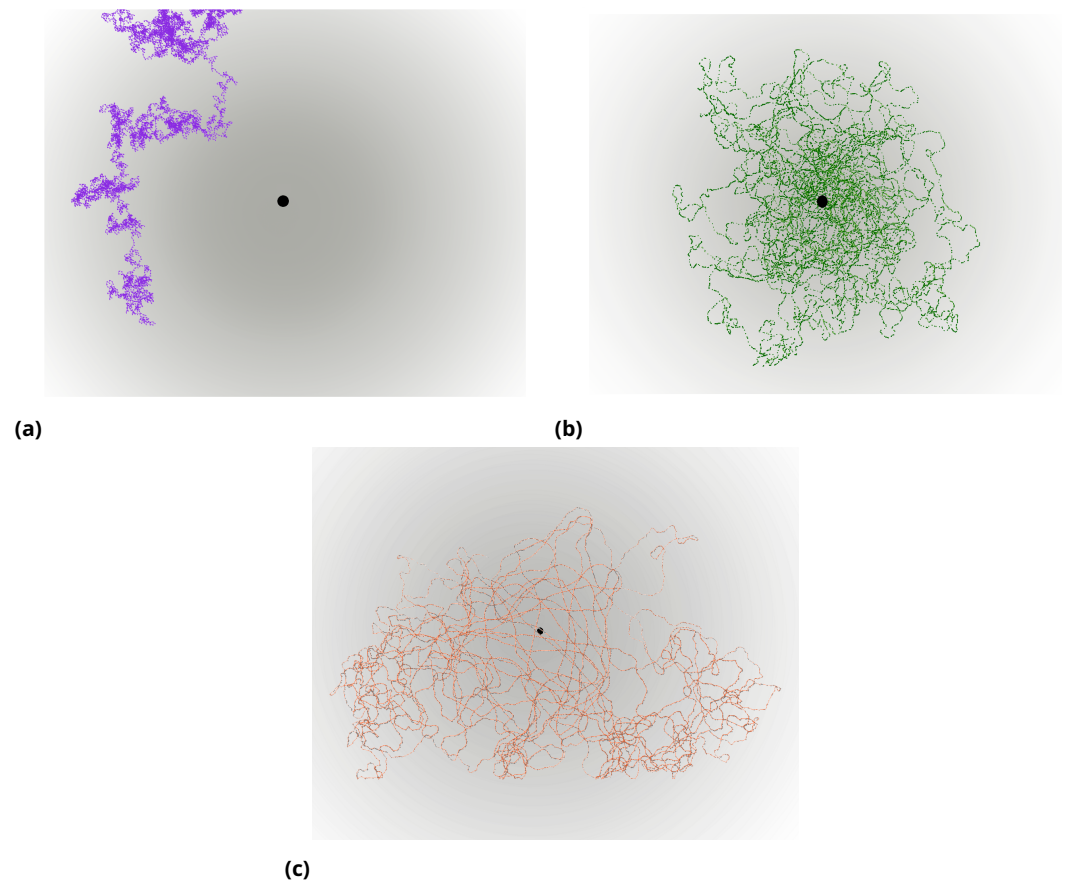

**Figure 1.** Trajectories of the random walk (left), the SML (right), and the NHMRW (bottom) models in a two-dimensional space. Results based on 1000 trajectories for each models.

91 our view, while to details of our three-level model reflects the intricacies of the biology, its behaviour  
92 would be indistinguishable from a **non-homogeneous Markovian random walk** (NHMRW) process.

## 93 Results

### 94 **The Macroscopic Behavior of the SML model is indistinguishable from a NHMRW.**

95 We characterize the macroscopic behavior of the SML model by comparing it with a random walk -as  
96 an unbiased foraging process- and the non-homogeneous random walk. The qualitative behavioral  
97 difference with the random walk is clear (Figure 1).

98  
99 While cells in the random walk process are roaming around and spent most of their time in  
100 a random location without any correlation between the concentration of the nutrients and their  
101 location, the bacterium in the SML model revolves around the high concentration area, i.e., nutrient  
102 concentration values and spatial movement direction are strongly correlated.

103  
104 However, there is a behavioral similarity between the SML and non-homogeneous random  
105 walk model (NHMRW): in the NHMRW, similar to the SML model, the movement to areas of higher  
106 chemoattractant concentration is more preferable (Figure 1). Both models show the same dynamical  
107 behavior for  $\varphi$  as the concentration of nutrients varies. Moreover, the mean deviation angle, namely,  
108  $64^\circ$ , is consistent with the findings of the experimental observations by *Turner et al. (2016)* (table  
109 2). The experimental mean value for *E. coli* tumble angle was found to be around  $68^\circ$  (*Berg et al.,*  
110 *1972*), and  $64^\circ$  (*Turner et al., 2016*).

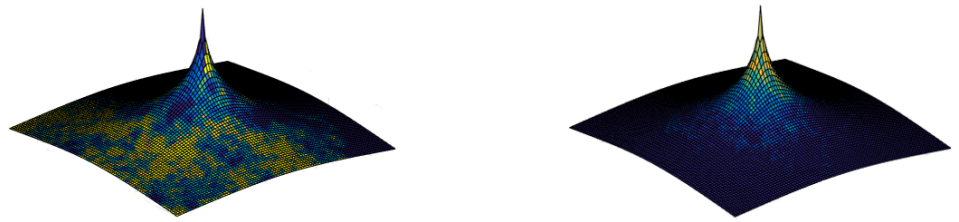

**Figure 2.** Trajectories of 1000 simulations in the random walk (left) and the SML model (right). Starting points are randomly chosen point, with random angles, 300 units away from the nutrient source. Each run will end if the particle finds the nutrient resource or the number of simulation steps exceeds 3000. The height reflects the density of particles.

**Table 1.** Averaged number of simulation steps for particles to reach the maximum concentration.

| value | SML   | NHMRW  | Random Walk |
|-------|-------|--------|-------------|
| mean  | 50.5  | 48.3   | 422.1       |
| std   | 29.01 | 30.7.5 | 387.1       |

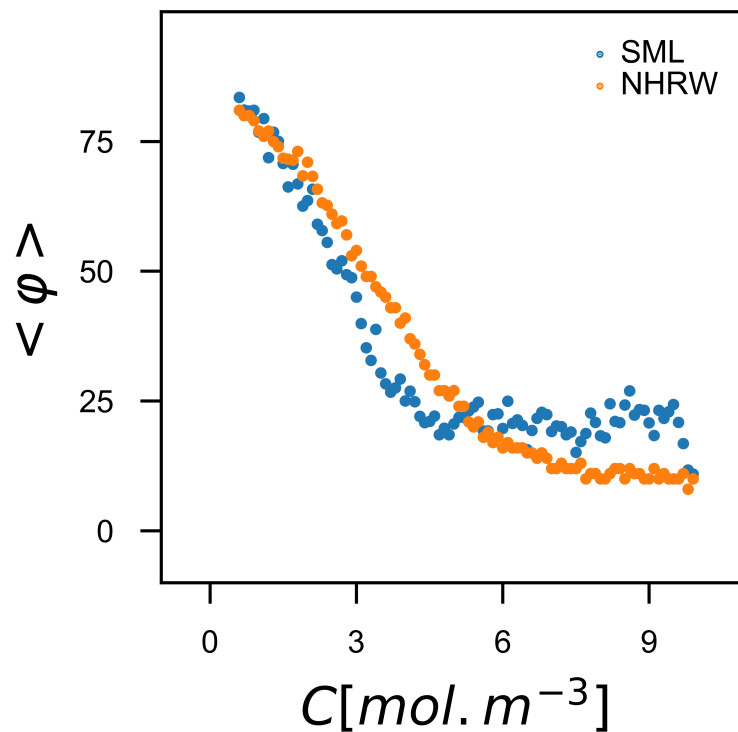

**Figure 3.** Changes in the movement direction of the particles at each simulated step with respect to their previous direction. As glucose concentration increases, *E. coli* frisks less and waggles more, i.e., there are less variations in the direction of movement. The results are averaged over 1000 simulations.

**Table 2.** The average change in the direction of particles in each simulation step in comparison with the experimental data sets from *Berg et al. (1972)* and *Turner et al. (2016)*, respectively.

| value     | SML   | NHMRW | Random Walk | data set   |
|-----------|-------|-------|-------------|------------|
| $\varphi$ | 57.5° | 59.9° | 38.9°       | (68°, 64°) |

**Table 3.** CW and CCW switching rates as comparison with the experimental outputs in (*Mears et al., 2014*)

|                                  | SML    | experiments  |
|----------------------------------|--------|--------------|
| $CW \Rightarrow CCW$             | 0.21 % | $0.26s^{-1}$ |
| $CCW \Rightarrow CW$             | 0.79 % | $1.7s^{-1}$  |
| <i>Average CW bias of motors</i> | 0.21 % | 0.13         |

111

112 Bacteria tumble more frequently as they move in areas with nutritional deficiency, to increase  
 113 the chance of survival (Figure 4). Qualitatively, tumbling frequency in the SML model agrees well  
 114 with the experimental reported data sets (*Balázsi et al., 2011; Mittal et al., 2003*). In this work, this  
 115 quantity is calculated by scaling the concentration to the range [0, 10] and considering the steps  
 116 with deviation angle greater than 25° as tumble.

117 **The rotational directions of all flagella combined determine the direction of move-**  
 118 **ment.**

119 In *E. coli*, the flagellar rotation is the driving force behind motility. In response to the changing  
 120 nutrient concentration, the chemical network in the cell regulates the rotational direction of each  
 121 flagellum ( $CW \rightleftharpoons CCW$  rate). Consequently, the cell is capable of adjusting its mean speed and the  
 122 distribution of tumbling angles to position itself more effectively. The switching rates of flagellar  
 123 motors from the SML model are comparable with reported values in *Mears et al. (2014)* (table 3).

124 **The chemical network results in directional sensing.**

125 The concentration of CheY-p plays a major role in the signaling network of *E. coli* chemotaxis. A  
 126 well-known feature of the chemotactic network is the sigmoidal relation between the direction of  
 127 the flagellar rotation and the CheY-p concentration (*Yuan and Berg, 2013*). A comparison between  
 128 the CheY-p concentration from our Gillespie simulation (the chemical level) and the experimental  
 129 data in *Mears et al. (2014); Lele et al. (2015); Terasawa et al. (2011)* is given in table 4. Any change  
 130 in the CheY-p concentration would cause a change in the probability of rotational direction of  
 131 flagellar motors (*Sagawa et al., 2014*). On average,  $13 \pm 7$  and  $2 \pm 4$  CheY-p molecules bind to a  
 132 flagellar motor during CW and CCW rotation respectively (*Fukuoka et al., 2014; Segall et al., 1985*).

133 **Discussion**

134 Gazing upon the movement of living entities invariably instigates a chain of thorny questions  
 135 regarding the nature of movements. As Aristotle observed, in his *De Motu Animalium*, "it remains

**Table 4.** Comparison between CheY-p concentration calculated by SML model and experiment (*Mears et al., 2014*).

|                         | SML  | experiments |
|-------------------------|------|-------------|
| Mean([CheY-p]) $\mu M$  | 1.69 | 2.59        |
| Var([CheY-p]) $\mu M^2$ | 0.76 | 1           |

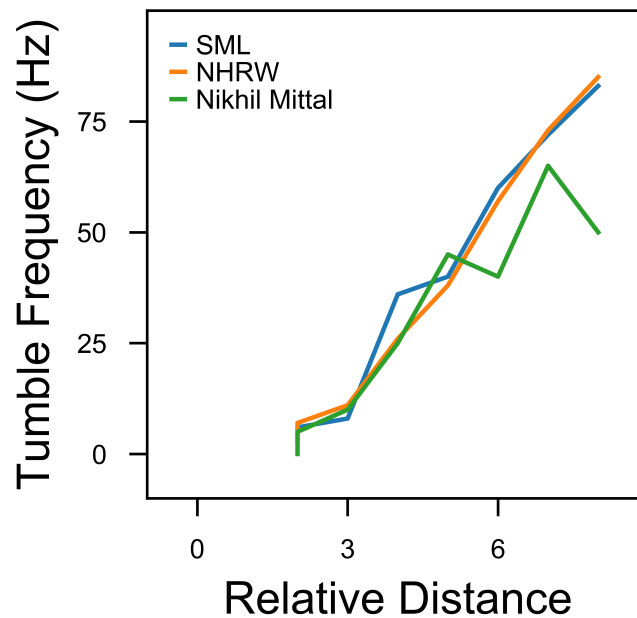

**Figure 4.** According to the results in *Mittal et al. (2003)*, the tumble frequency positively correlates with the distances from the resource. The same pattern is observed in the SML model, where the chemoattractant concentration decreases radially away from the resource, hence, *E.coli* would change its direction more frequently. Following *Mittal et al. (2003)*, we considered angles greater than 25° as tumbling.

136 to inquire how the soul moves the body, and what is the origin of movement in a living creature”  
137 (*Barnes (1995)*, p.2383). It is tempting to scoff at the idea of an *èlan locomotif* pushing a living entity  
138 forward, but one can hardly fault an observer studying the movement of a bacterium under the  
139 light microscope for inferring a certain intentionality from the movements of that organism.

140

141 The movement of a bacterium, such as *E. coli*, can be characterized as a series of “decision”.  
142 Throughout this work, we have used decision making as a mere shorthand to denote change in the  
143 behavior of the organism caused by processes at the molecular level; a kind of decision making  
144 that is devoid of any intentionality and comprehension. To achieve this, our SML model simulates  
145 the CW and CCW rotations of flagella as a function of the concentration of chemoattractants in  
146 the environment. The comparison between the SML model and a random walk alternative vividly  
147 demonstrates the efficacy of our model, whereby our digital *E. coli* spends significantly more time at  
148 zones with higher chemoattractant concentrations (fig. 2 and table 1). The SML model is unique in  
149 that it simulate a bacterium with six functional flagella. This level of realism in simulating cell motility  
150 is absent from similar studies, which are content with including a single fellaglla. This melange of  
151 modest, yet unprecedented, cellular realism, and a stochastic approach to simulating molecular  
152 process, a salient feature of the SML model, is an attempt to reflect the inherent complexity, as well  
153 as the innate stochasticity, of living entities.

154

155 The probabilistic nature of the SML model means that chemoattractant concentrations below the  
156 sensitivity of this model results in a behavior indistinguishable from the random-walk alternative,  
157 but as the chemoattractant concentration increases, so does the bias of *E. coli* movement (fig.  
158 3). The comparison between the SML model, the Markovian model, and the experimental data  
159 indicates the similarity between the SML model and the way *E. coli* behaves in real life (table 2). The  
160 mean angle of movement in our model is slightly different from experimental data (57.5° versus 64°  
161 (*Berg et al., 1972*) and 68° (*Turner et al., 2016*)). This slight discrepancy can be partly attributed to  
162 neglecting near-zero angles in the experiments; a similar discrepancy can be observed between

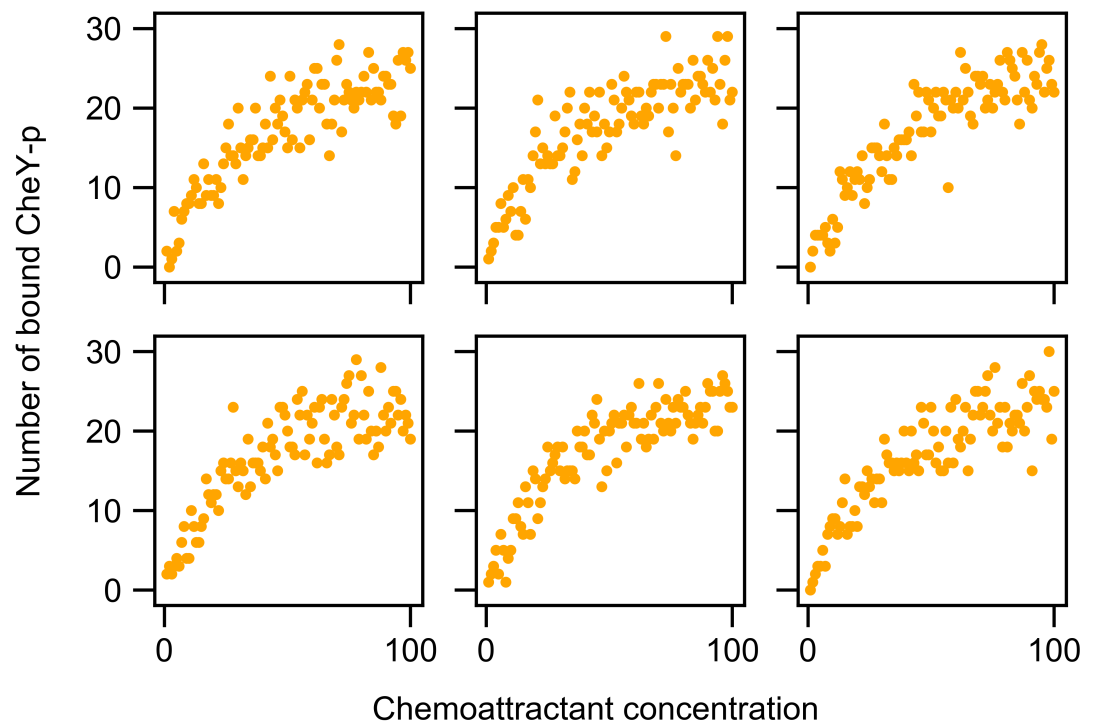

**Figure 5.** The number of *CheY* molecules bound to each flagellum in different chemoattractant concentrations. The binding of the phosphorylated *CheY* (*CheY*-p) to flagellar motors increases the probability of a transition from CCW to CW rotation of the motor.

163 Turner et al.,2016 and Berg et al.,1972, where different thresholds to distinguish running from  
164 tumbling were used. In this work, tumbling, defined as a movements with angle  $> 25^\circ$ , is determined  
165 by the resultant movement vector of all flagella. The movement vector for each flagellum depends  
166 on its direction of rotation, itself the function of the number of *CheY*-P proteins attached to it.  
167 Treating the movement of each flagellum independently is in accordance with studies such as Mears  
168 et al.,2014.

169  
170 The similarity between the SML model, with all its molecular accoutrements, and the Markovian  
171 model, might seem quite irrelevant on the surface: The Markov process simply captures the  
172 macroscopic behavior, while utterly oblivious to the intricacies at the cellular level. However, this  
173 similarity can be interpreted in a starkly different manner: our Markovian model, though deeply  
174 devoid of any biological realism, can keep up with the SML model, in describing the macroscopic  
175 level. While no molecular machinery can be gleaned from the Markovian model, it does enable us  
176 to predict the behavior of a living entity in an accurate fashion.

177  
178 Why should we bother with a hierarchical model, combining physical and chemical levels to  
179 investigate the movement of a cell? This layered approach allows for different experimental  
180 measurements to be incorporated in a singular model. In addition, by utilizing an approach similar  
181 to the SML model, one can compare results studies at the chemical level (e.g., Shimizu et al,2010  
182 and Sourjik and Berg,2002b) with treatments of the physical level (e.g., Rodenborn et al.,2013).  
183 A detailed model of any cellular behavior, such as cell movement, enables us to make testable  
184 predictions as well.

185  
186 Our attempt here was to reconstruct the behavior of a complex entity, namely a free-living  
187 prokaryote, by incorporating a detailed chemical level to a physical level. It is only natural that the

188 exact behavior of the SML model would change if you change the parameters (for example, the rate  
189 of Chey-P attachment to a flagellum reported by *Hosu and Berg (2018)* - which we used in our model  
190 - differs from that of *Bai et al. (2012)*). More generally, modelling is a process of simplification and  
191 these simplifications, such as treating *E. coli* cell as a sphere, might result in further deviations from  
192 reality.

193

194 Despite all the possible fine tunings and the inescapable reductionism inherent in a model  
195 of movement, we can qualitatively answer what Aristotle asked about the seemingly magical  
196 feature of living bodies, i.e., to move without being moved. It is not a “soul” that moves the entity  
197 forward, but the stochastic chemical reactions that become biased enough in response to the  
198 environmental cues. Here, we have shown that a seemingly complex feature of *E. coli*, namely  
199 its ability to explore the environment, simulated here using a multi-layered model, can be easily  
200 reduced to non-homogenous Markov process. A biased random walk that at the macroscopic level  
201 that is so deceptively directed as to imply a sort of intent to the untrained observer. But the reality  
202 is far more pedestrian, and yet far more majestic. The seething chemical soup within a living cell  
203 can result in a behavior -i.e., movement- that seems utterly alive.

## 204 **Methods**

205 To simplify the implementation of the cell migration and mobility, we mainly focus on the cell  
206 chemotaxis without considering cell division; moreover, we consider *E. coli* as a sphere with non-  
207 interacting flagella.

## 208 **Chemical Intracellular Interactions**

209 The eukaryotic means of detecting the chemical gradient in the environment directly is not useful  
210 to bacteria given their comparatively diminutive size. In fact, many chemotactic bacteria navigate  
211 by measuring temporal changes in concentration as they swim. The classical stochastic simulation  
212 algorithm (SSA) by Gillespie and its modified versions are widely used to simulate the stochastic  
213 dynamics of biochemical reaction systems. It has, however, remained a challenge to implement  
214 accurate and efficient simulation algorithms for general reaction schemes in growing cells (*Yu et al.,*  
215 *2010*).

216 Figure 6 shows the schematic view of *E. coli* and its chemotactic chemical network. *E. coli* can  
217 merely sense the environment by an array of chemoreceptors to perceive the concentration of  
218 chemoattractants. This sensory array triggers the inner network in *E. Coli*. The probability of CheY-p  
219 protein binding to motors is regulated by the input of inner network as the Navigation system. We  
220 apply a radially-decreasing nutrient gradient away from a local resource, in which the attractant  
221 concentration,

$$222 \quad C(r) = C_2 \times \frac{R_0}{r}, \quad r > R_0, \quad (1)$$

222 is constant within a ball of radius  $R_0 = 100\mu m$ .

223

As a cell swims, chemoattractant molecules bind to the receptors on the cell surface; therefore,  
a signal from receptors would be transmitted, stochastically, through a biochemical network to one  
or more of the flagellar motors, which controls the speed and direction of the flagellar rotations.  
We assume the following dependency for the sensitivity of these receptors to the chemoattractant  
concentration,  $C$ ,

$$224 \quad f(C) := \begin{cases} \text{Linear,} & C < C_i \\ \text{Logarithmic,} & C_i \ll C \ll C_a \\ \text{plateau,} & C > C_a \end{cases} \quad (2)$$

224 in this work, the values for the threshold concentration,  $C_i = 0.0182mM$  and  $C_a = 3mM$ , are assumed  
225 according to *Shimizu et al. (2010)*. Thus, as a cell approaches a high concentration of nutrients, its



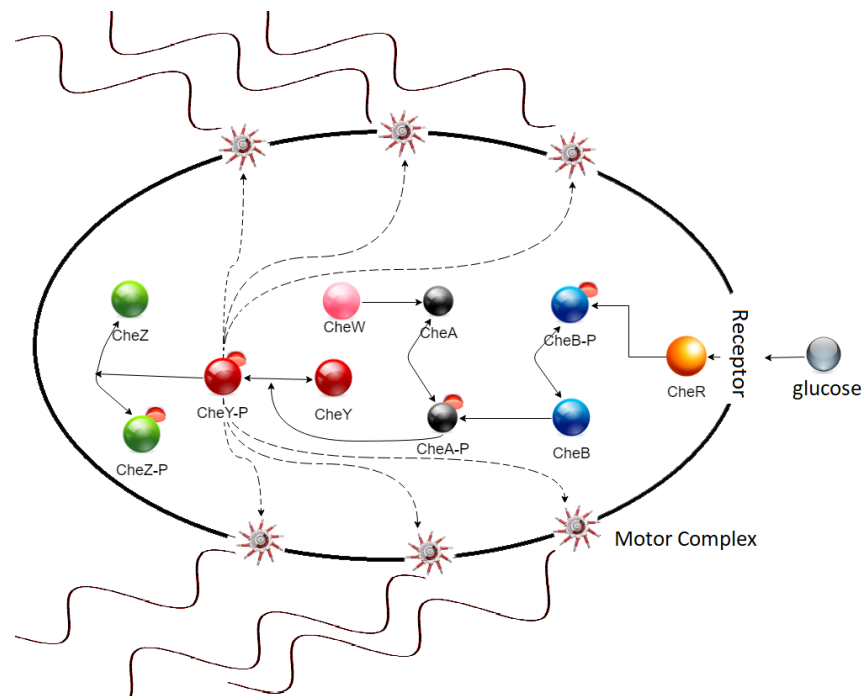

**Figure 6.** Schematic diagram depicting the body of *E. coli* and the chemical network inside the cell. Receptors sense the chemoattractant concentration from the environment, then trigger signaling cascade in the chemotactic network. The number of CheY-p proteins bound to the motor complex of each flagellum– resulted from internal chemotactic network– determines the rotational direction of that flagellum.

226 sensitivity decreases, which effectively increases the value of *CheR*, see chemical network in figure 6.  
 227 In order to fulfill the logarithmic dependency,

$$f(C) = \ln\left(\frac{1 + C/C_i}{1 + C/C_a}\right), \quad (3)$$

228 a localized attractant resource was assumed.

229

230 Chemoreceptors in *E. coli* are coupled to the flagella by a phosphorylated intermediate, CheY-p.  
 231 CheY-p activity can be inferred from the rotational bias of the flagellar motors, although the motor  
 232 response is stochastic and limited to a narrow physiological range (*Sourjik and Berg, 2002*).

### 233 Chemotactic Network

234 The signal transduction between receptors and flagellar motors is controlled by a set of well-defined  
 235 intracellular protein-protein interactions (*Wadhams and Armitage, 2004*). The core of the network  
 236 is a two-component signal transduction system that carries the chemical information, gathered  
 237 by transmembrane receptors, to flagellar motors responsible for the cell propulsion (Figure 6).  
 238 A second group of proteins allows cells to physiologically adapt to the changing levels of the  
 239 background signal, enabling them to track signal gradients over many orders of magnitude.

240

241 While different receptors allow cells to sense different signals, all signals are then processed  
 242 through the same set of cytoplasmic proteins, responsible for signal transduction and adaptation.  
 243 Signals can vary in time, space, and identity; consequently, this horizontal integration may impose  
 244 incompatible demands on the regulation of these core *decision-making* components. In this study,  
 245 we applied a simplified abstract network in which a number of intracellular proteins– known as  
 246 chemotaxis (Che) proteins– provide the necessary signaling cascade which links the membrane  
 247 receptors to the flagellar motors (Figure 6). CheW and CheA are chemotactic proteins bound to

248 the receptors. CheW is thought to act as a link between the receptors and CheA. In addition, CheA  
249 appears to directly interact with the receptors. To bring about tumbling, the receptors activate CheA  
250 autophosphorylation on a conserved histidine in response to decreased attractant or increased  
251 repellent concentration. One of the phosphoryl groups is transferred to CheY. CheY-p shows  
252 a reduced affinity for CheA and a higher affinity for the flagellar motor protein FliM. Therefore,  
253 it diffuses through the cytoplasm to the motors. CheZ acts to dephosphorylate CheY-p at the  
254 receptors to regulate the rate of signal termination (*Tindall et al., 2008*).

### 255 Flagellar Rotation

256 The rotation of the bacterial flagellar motors is controlled by the above mentioned signal transduc-  
257 tion pathway. The switch from CCW to CW rotation is triggered by binding of the signaling protein  
258 CheY-p to the motor. The direction of flagellar rotation and the amount of the generated torque is  
259 regulated by a complex at the bottom of the basal body called the switch complex, constructed  
260 from FliG, FliM, and FliN proteins (*Sarkar et al., 2010*). The distribution of CW and CCW switching  
261 intervals depends on parameter sets for the volume of localization and the number of localized  
262 molecules (CheZ) (*Yu et al., 2010*). A discrete stochastic model captures the fluctuations in the  
263 rotational direction of the flagellar motors ( $CW \rightleftharpoons CCW$ ), in which the random binding of CheY-p  
264 proteins to the motor-binding protein FliM leads to the motor switching from either a CCW rotation  
265 to CW or vice-versa. The probability of CCW rotation is assumed proportional to the concentration  
266 of CheY proteins,

$$P(CCW) = \frac{X(CCW)}{X(CCW) + X(CW)} \quad (4)$$

267 The parameters in this model have been chosen based on the available experimental data  
268 (*Fukuoka et al., 2014*). On average,  $13 \pm 7$  and  $2 \pm 4$  CheY-p molecules bind to a flagellar motor  
269 during CW and CCW rotation, respectively,

$$X(CCW) \sim \mathcal{N}(2, 4) \quad ,$$

and

$$X(CW) \sim \mathcal{N}(13, 7) \quad ,$$

270 where  $\mathcal{N}(i, j)$  means  $X$  has normal distribution with *mean*  $i$  and *variance*  $j$ . The number of CheY-p  
271 molecules binding to CW rotatory motor plateaus at about 13 molecules, instead of saturating at 34  
272 molecules which is the number of FliM subunits (*Hosu and Berg, 2018*).

273 Based on our assumptions, there is no correlation between the rotational direction of flagellar  
274 motors. Any interaction between flagellar motors and CheY-p- generated by chemoreceptors-  
275 would be inhibited by the CheY, which is distributed uniformly throughout the cell. Rotational  
276 direction of motors is dictated by CheY-p and the motor closer to the chemoreceptor patch would  
277 switch earlier than a motor farther from it (*Terasawa et al., 2011*).

### 278 Physical Movement Mechanism

279 The cell body is considered as a solid sphere of diameter  $R_b = 9\text{\AA}$  with six flagella of length  $L = 6.6\mu\text{m}$   
280 randomly distributed on the cell membrane, see figure 6. Flagellar diameter depends on its state  
281 (*Rodenborn et al., 2013*) (table 5).

282 Flagellar motors are capable of rotating with angular speeds of up to hundreds Hertz, enabling  
283 the bacterium to propel itself through the extracellular environment. To model the role of the  
284 flagella in the motility of *E.coli*, it requires to calculate the total force generated by all flagella. At  
285 each time step, each flagellum exerts a force with magnitude and direction driven by its rotatory  
286 motor which is the result of the stochastic chemotactic network. Consequently, the total force-  
287 applied on the cell body by all the flagella- would be a stochastic quantity.

288 The helical flagella are driven by a rotary motor embedded in the wall of the body, spinning with  
289 angular speed  $\Omega_m$  relative to the body (*Hu et al., 2015*). Each *flagellum* by its rotation causes a drag

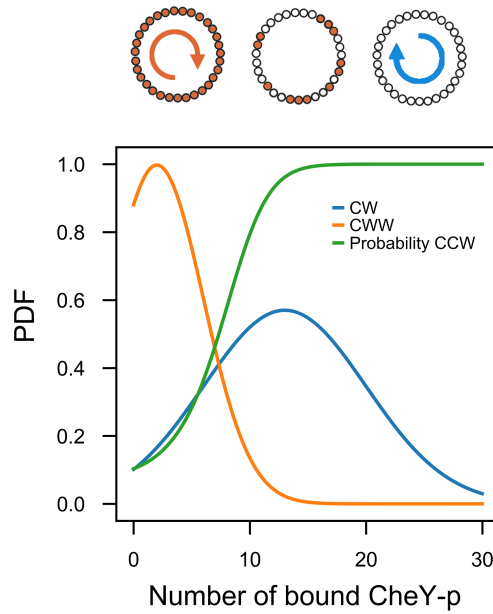

**Figure 7.** The binding of CheY-p to the flagella motors (depicted as filled in circles) increases the probability of a transition from CCW to CW rotation of the motor. Correlation between CCW/CW rotation of flagellum and the number of bound CheY-p. The binding of CheY-p to the flagella motors increases the probability of a transition from CCW to CW rotation of the motor.

**Table 5.** Parameters used in Eq. 5

| Parameter         | Value                        |
|-------------------|------------------------------|
| R(CCW)            | $0.195 \pm 0.25 \mu\text{m}$ |
| R(CW)             | $0.210 \pm 0.25 \mu\text{m}$ |
| $\lambda/R$       | 11                           |
| $L/\lambda$ (CCW) | 2.8                          |
| $L/\lambda$ (CW)  | 2.7                          |
| $\tan(\alpha)$    | $2\pi R/\lambda$             |

290 force  $F_i$ ,  $i \in [1 : 6]$ . For simplicity's sake, we assume flagella are distributed around the body in  
 291 only two directions relative to the cell surface: 1) when a flagellum rotates CCW, it would be aligned  
 292 parallel to the cell body, as well, its generated force; 2) when it rotates CW, the force is perpendicular  
 293 to the cell body. At low Reynolds numbers (the linear Stokes equations), by applying an external  
 294 force  $F_i$ , a solid body will move with velocity  $U$ , which is proportional to the angular speed (*Lauga*  
 295 *and Powers, 2009; Lauga, 2016*), by assuming  $L \gg R_b$ ,

$$|U_i| \approx \alpha \frac{\xi_{\parallel} - \xi_{\perp}}{\xi_{\parallel}} \left( \frac{\xi_r}{\xi_{\perp}} \right) \left( \frac{R_b^3}{R.L} \right) \Omega_m \quad (5)$$

296  $\xi_{\parallel}$  and  $\xi_{\perp}$  are drag coefficients on the directions parallel and perpendicular to the flagellum, respec-  
 297 tively (typically  $\xi_{\perp}/\xi_{\parallel} \sim 2$ ). Movement direction of a cell, subject to applied forces by 6 flagella, is  
 298 determined by the resultant velocity vector,  $\vec{U}_{total} = \sum_{i=1}^6 \vec{U}_i$ .

299

Therefore, it would be possible to evaluate the direction ( $\phi$ ) and step length ( $l$ ) of the next foraging step.  $\phi$  is in line with the direction of  $U_{total}$  and by assuming a fixed speed,  $l = U_{total} \times \tau_{step}$  (*de Lima Bernardo and Moraes, 2011*). According to the experimental results, run and tumble

duration times are exponentially distributed with mean values  $\langle \tau_{run} \rangle \sim 1s$  and  $\langle \tau_{tumble} \rangle \sim 0.1s$ , respectively, (Alon *et al.*, 1998). In our model we have only one type of movement, thus, for each time interval, we select a random number from the exponential distribution with  $\langle \tau_{step} \rangle \sim 1s$ . By calculating  $\phi$  and  $l$ , the next spatial position is taken as follow,

$$\begin{aligned} X_{new} &= X_{old} + l \times \cos(\phi) \\ Y_{new} &= Y_{old} + l \times \sin(\phi), \end{aligned} \quad (6)$$

300 and the simulation will be continued the same way.

## 301 Supporting Information

### 302 Non-homogeneous Random Walk

303 In an abstract view, we modeled the chemotaxis of *E. coli* as a non-homogeneous random walk.  
304 In this stochastic process, in each simulation step, the probability distribution of speed, direction,  
305 and time interval for the next step are independent of each other. The time interval of each step  
306 ( or waiting time until the next turning point) comes from an exponential distribution with mean  
307 value  $\langle \tau_{step} \rangle \sim 1s$  and a normal distribution governs the speed of each step. In order to derive  
308 the direction of each step with respect to the previous step,  $\varphi$ , which is strongly influenced by the  
309 concentration of nutrients, we applied a Beta distribution function,

$$P(x, \alpha, \gamma) = \frac{x^{\alpha-1}(1-x)^{\gamma-1}}{B(\alpha, \gamma)}, \quad (7)$$

310 where  $x$  depends on the chemoattractant concentrations limited to  $0 \leq x \leq 1$ .  $B(\alpha, \gamma)$ , Beta function  
311 (Forbes *et al.*, 2010), is the normalization constant,

$$B(\alpha, \gamma) = \frac{\Gamma(\alpha)\Gamma(\gamma)}{\Gamma(\alpha + \gamma)}, \quad (8)$$

312 with  $\alpha, \gamma > 0$ . In this model, we limited  $\varphi$  to  $[\varphi_{min}, \varphi_{max}]$ ; the selected values for the upper and  
313 lower limits are according to experimental measurements (Masson *et al.*, 2012). To simplify our  
314 calculation, we rescaled the limits of  $\varphi$  to  $[0, 1]$  range,

$$\psi = \frac{\varphi - \varphi_{min}}{\varphi_{max} - \varphi_{min}}. \quad (9)$$

315

316 To specify the Beta function in Eq. 7, we need to assign  $\alpha$  and  $\gamma$  values. To achieve the desired  
317 configuration for the distribution function of angels (Masson *et al.*, 2012), we exerted identical  
318 values for  $\alpha$  and  $\gamma$ , dependent on the chemoattractant concentrations,

$$\alpha = \gamma = 9 \times \frac{C - C_{min}}{C_{max} - C_{min}} + 1, \quad (10)$$

319 which are in the range of 1 to 10 (Figure 8) illustrates the Beta distribution for different values of  $\alpha$   
320 and  $\gamma$ . Based on Eq. 10, for the minimum values of the chemoattractant concentration, both  $\alpha$  and  
321  $\gamma$  are equal to 1 and the Beta distribution would be equivalent to the uniform distribution; hence,  
322 all valid angels in the range of  $[\varphi_{min}, \varphi_{max}]$  would have the same chance to be selected.

323

324 Whenever *E. Coli* receives the chemoattractant at the highest value,  $\alpha$  and  $\gamma$  take the value of  
325 10 and movements along an straight line are more probable. The receptors sense the intensity of  
326 glucose concentration by a Monod function (Eq. 3). The inner network determines the rotational  
327 direction of each flagellum by calculating the number of CheY-p proteins bound to the motors.  
328 In this model, the nutrient concentration,  $C$ , highly affects values of  $\alpha$  and  $\gamma$ . Consequently, any  
329 variation in  $\alpha$  and  $\gamma$  will change the probability distribution in Eq. 7. In fact, in the non-homogeneous  
330 random walk model, the decision-making network is modeled through probability distribution

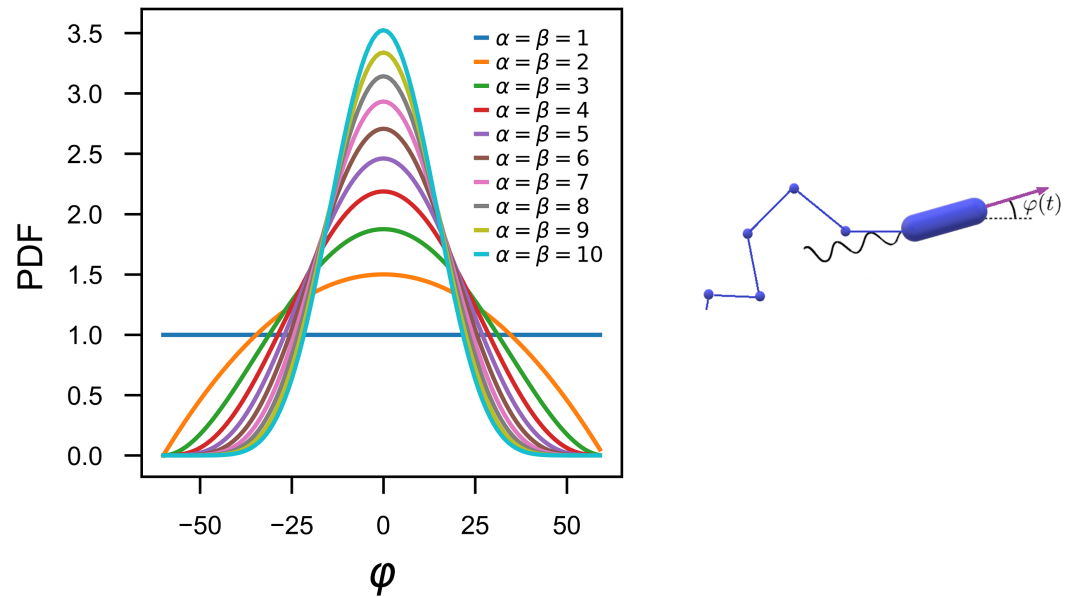

**Figure 8.** The concentration of chemoattractant strongly affect the distribution of the relative angle between two consecutive steps  $\varphi(t)$ . Different values from the Beta distribution result different directions of movement for the cell (Right). The shapes of Beta distribution for different input sets,  $\alpha$  and  $\beta$ , shown by  $B_i$  (Left). In an environment with uniform distribution of nutrients, the distribution of  $\varphi$  is uniform as well, the blue curve; i.e., every direction has the same chance of being chosen. As a result of a non-uniform distribution of nutrients, a normal distribution will emerge (the green curve).

331 functions. Indeed, to perform the simulation, after generating a random number  $x$  from  $P(x)$  in Eq.  
332 7, direction of movement,  $\varphi$ , could be derived as follow,

$$\varphi = \varphi_{min} + x \times (\varphi_{max} - \varphi_{min}). \quad (11)$$

333

334 A normal distribution  $\mathcal{N}(\mu, 10)$  with mean  $\mu$ , from Eq. 12, gives the speed of the next step.

$$\mu = 20 + \left| \varphi - \frac{\varphi_{max} + \varphi_{min}}{2} \right|. \quad (12)$$

335 Knowing the speed, direction and duration of each step, we readily compute the next spatial  
336 position by Eq. 6.

337 *flagella-CheY-P* concentration changing dynamics

### 338 Acknowledgments

339 We would like to thank Dr. Yazdan Asgari for his early works relevant to this study.

### 340 Additional Information

#### 341 Author contribution

342 MS conceived the model and helped draft the manuscript. KK contributed to the initial idea.  
343 HS contributed to the physical layer of the model. SV constructed the model, performed the  
344 simulations, and drafted the manuscript. SV and AK visualized the data. MS and AK contributed to  
345 the introduction and the discussion. MS, HS, and AK critically revised the manuscript. All authors  
346 gave final approval for publication.

#### 347 Funding

348 This research did not receive any specific grant from funding agencies in the public, commercial, or  
349 not-for-profit sectors.

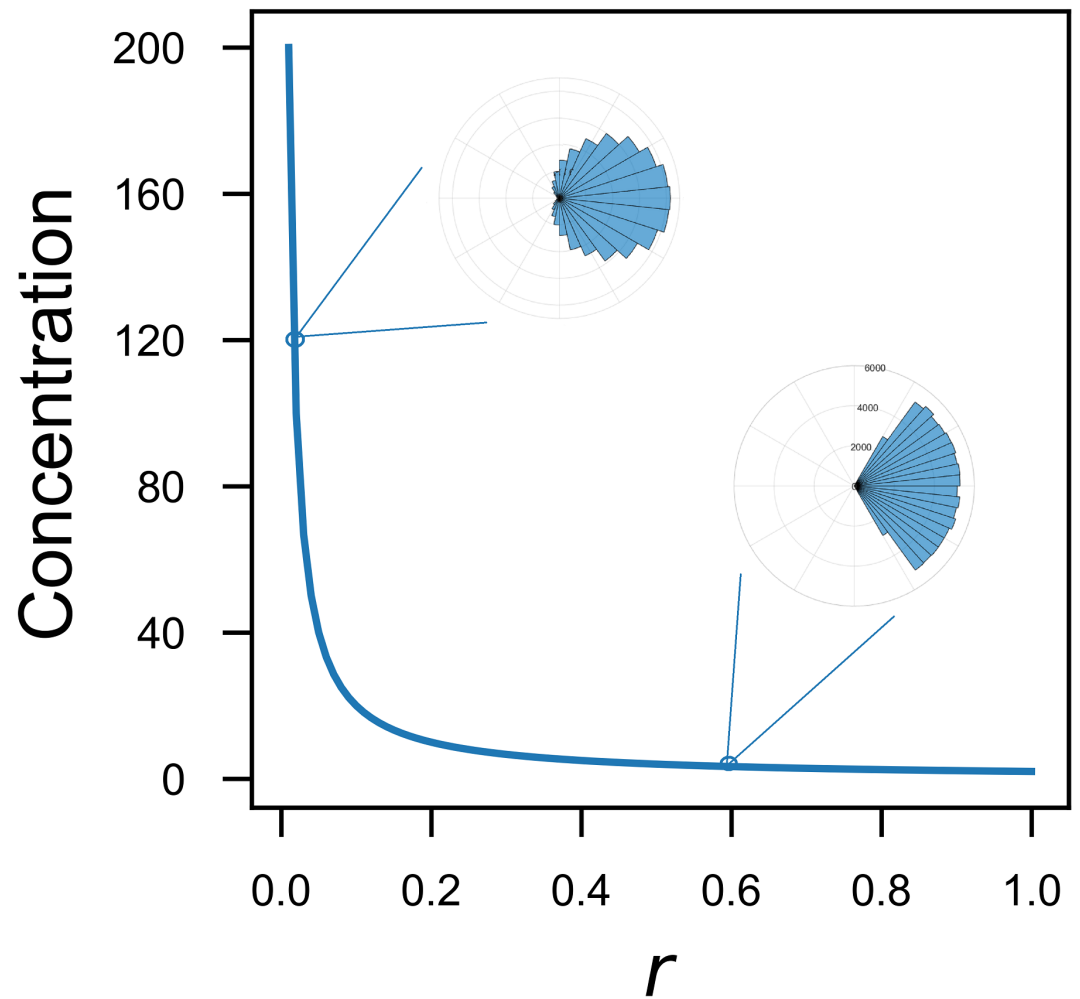

**Figure 9.** The concentration of the perceived nutrients by the chemotactic network ( $r$ ) affects the distribution of angles. As the perceived concentration increases, so does the probability of smaller angles, i.e., movement closer to a straight line. However, there is not a straightforward linear relation between them since many parameters, including the sensitivity of the receptor (Eq. 3) play roles.

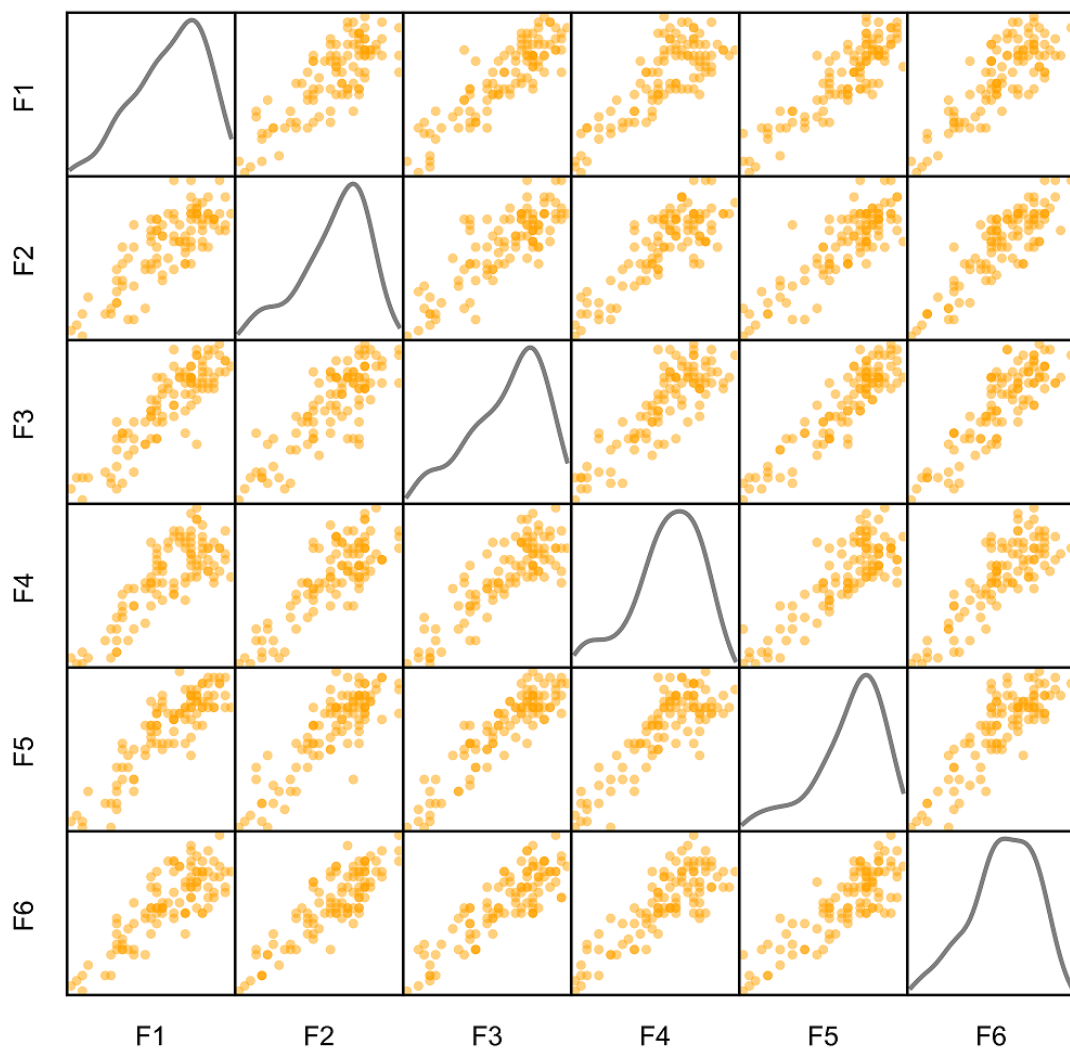

**Figure 10.** There is no absolute correlation between the flagella or the position of the flagella in the SML model. The diagonal figures are histogram plots of number of each flagella. Each figure in the  $r$  the row and  $c$  the column of the matrix shows correlation between flagella  $r$  and  $c$ .

## 350 **Availability of data and material**

351 The software used to run all simulations was C# .NET Framework 4 and the scripts are available at  
352 <https://github.com/safarvafadar/chemotaxis>.

## 353 **Competing interests**

354 The authors declare that we do not have competing interests.

## 355 **Additional files**

### 356 **Supplementary files**

- 357 • Movie S1 : A short clip depicting a digital bacterium in a random walk regime.
- 358 • Movie S2 : A short clip depicting a digital bacterium motility based on our SML model.
- 359 • Movie S3: A short clip depicting a digital bacterium in a non-homogeneous Markov regime.

## 360 **References**

- 361 **Alon U**, Camarena L, Surette MG, y Arcas BA, Liu Y, Leibler S, Stock JB. Response regulator output in bacterial  
362 chemotaxis. *The EMBO journal*. 1998; 17(15):4238–4248.
- 363 **Bai F**, Minamino T, Wu Z, Namba K, Xing J. Coupling between switching regulation and torque generation in  
364 bacterial flagellar motor. *Physical review letters*. 2012; 108(17):178105.
- 365 **Balázsi G**, van Oudenaarden A, Collins JJ. Cellular decision making and biological noise: from microbes to  
366 mammals. *Cell*. 2011; 144(6):910–925.
- 367 Barnes J, editor. *The Complete Works of Aristotle*. Princeton University Press; 1995.
- 368 **Berg HC**, Brown DA, et al. Chemotaxis in *Escherichia coli* analysed by three-dimensional tracking. *Nature*. 1972;  
369 239(5374):500–504.
- 370 **Block SM**, Segall JE, Berg HC. Impulse responses in bacterial chemotaxis. *Cell*. 1982; 31(1):215–226.
- 371 **Block SM**, Segall JE, Berg HC. Adaptation kinetics in bacterial chemotaxis. *Journal of bacteriology*. 1983;  
372 154(1):312–323.
- 373 **Bray D**, Levin MD, Lipkow K. The chemotactic behavior of computer-based surrogate bacteria. *Current biology*.  
374 2007; 17(1):12–19.
- 375 **Chatterjee S**, da Silveira RA, Kafri Y. Chemotaxis when bacteria remember: drift versus diffusion. *PLoS*  
376 *computational biology*. 2011; 7(12):e1002283.
- 377 **Dufour YS**, Gillet S, Frankel NW, Weibel DB, Emonet T. Direct correlation between motile behavior and protein  
378 abundance in single cells. *PLoS computational biology*. 2016; 12(9):e1005041.
- 379 **Duke T**, Bray D. Heightened sensitivity of a lattice of membrane receptors. *Proceedings of the National Academy*  
380 *of Sciences*. 1999; 96(18):10104–10108.
- 381 **Elgeti J**, Winkler RG, Gompper G. Physics of microswimmers—single particle motion and collective behavior: a  
382 review. *Reports on progress in physics*. 2015; 78(5):056601.
- 383 **Flores M**, Shimizu TS, ten Wolde PR, Tostevin F. Signaling noise enhances chemotactic drift of *E. coli*. *Physical*  
384 *review letters*. 2012; 109(14):148101.
- 385 **Forbes C**, Evans M, Hastings N, Peacock B. *Statistical Distributions*, 4th edn (2011); 2010.
- 386 **Frankel NW**, Pontius W, Dufour YS, Long J, Hernandez-Nunez L, Emonet T. Adaptability of non-genetic diversity  
387 in bacterial chemotaxis. *Elife*. 2014; 3:e03526.
- 388 **Fukuoka H**, Sagawa T, Inoue Y, Takahashi H, Ishijima A. Direct imaging of intracellular signaling components  
389 that regulate bacterial chemotaxis. *Sci Signal*. 2014; 7(319):ra32–ra32.
- 390 **Goldbeter A**, Koshland Jr DE. Simple molecular model for sensing and adaptation based on receptor modifica-  
391 tion with application to bacterial chemotaxis. *Journal of Molecular Biology*. 1982; 161(3):395–416.
- 392 **Guo C**, Levine H. A thermodynamic model for receptor clustering. *Biophysical journal*. 1999; 77(5):2358–2365.



- 393 **Guo C**, Levine H. A statistical mechanics model for receptor clustering. *Journal of biological physics*. 2000;  
394 26(3):219–234.
- 395 **Hosu BG**, Berg HC. CW and CCW Conformations of the E. coli Flagellar Motor C-Ring Evaluated by Fluorescence  
396 Anisotropy. *Biophysical journal*. 2018; 114(3):641–649.
- 397 **Hu J**, Yang M, Gompper G, Winkler RG. Modelling the mechanics and hydrodynamics of swimming E. coli. *Soft  
398 matter*. 2015; 11(40):7867–7876.
- 399 **Jarrell KF**, McBride MJ. The surprisingly diverse ways that prokaryotes move. *Nature reviews microbiology*.  
400 2008; 6(6):466.
- 401 **Jiang L**, Ouyang Q, Tu Y. Quantitative modeling of Escherichia coli chemotactic motion in environments varying  
402 in space and time. *PLoS computational biology*. 2010; 6(4):e1000735.
- 403 **Kalinin YV**, Jiang L, Tu Y, Wu M. Logarithmic sensing in Escherichia coli bacterial chemotaxis. *Biophysical journal*.  
404 2009; 96(6):2439–2448.
- 405 **Kanehl P**, Ishikawa T. Fluid mechanics of swimming bacteria with multiple flagella. *Physical Review E*. 2014;  
406 89(4):042704.
- 407 **Kitajima M**, Toyota M. Decision-making and action selection in Two Minds: An analysis based on Model Human  
408 Processor with Realtime Constraints (MHP/RT). *Biologically Inspired Cognitive Architectures*. 2013; 5:82–93.
- 409 **Lauga E**. Bacterial hydrodynamics. *Annual Review of Fluid Mechanics*. 2016; 48:105–130.
- 410 **Lauga E**, Powers TR. The hydrodynamics of swimming microorganisms. *Reports on Progress in Physics*. 2009;  
411 72(9):096601.
- 412 **Lele PP**, Shrivastava A, Roland T, Berg HC. Response thresholds in bacterial chemotaxis. *Science advances*.  
413 2015; 1(9):e1500299.
- 414 **de Lima Bernardo B**, Moraes F. Simplified model for the dynamics of a helical flagellum. *American Journal of  
415 Physics*. 2011; 79(7):736–740.
- 416 **Masson JB**, Voisinne G, Wong-Ng J, Celani A, Vergassola M. Noninvasive inference of the molecular chemotactic  
417 response using bacterial trajectories. *Proceedings of the National Academy of Sciences*. 2012; 109(5):1802–  
418 1807.
- 419 **Matthäus F**, Jagodič M, Dobnikar J. E. coli superdiffusion and chemotaxis—search strategy, precision, and  
420 motility. *Biophysical journal*. 2009; 97(4):946–957.
- 421 **Mears PJ**, Koirala S, Rao CV, Golding I, Chemla YR. Escherichia coli swimming is robust against variations in  
422 flagellar number. *Elife*. 2014; 3:e01916.
- 423 **Mitchell A**, Romano GH, Groisman B, Yona A, Dekel E, Kupiec M, Dahan O, Pilpel Y. Adaptive prediction of  
424 environmental changes by microorganisms. *Nature*. 2009; 460(7252):220.
- 425 **Mittal N**, Budrene EO, Brenner MP, Van Oudenaarden A. Motility of Escherichia coli cells in clusters formed by  
426 chemotactic aggregation. *Proceedings of the National Academy of Sciences*. 2003; 100(23):13259–13263.
- 427 **Niu B**, Wang H, Duan Q, Li L. Biomimicry of quorum sensing using bacterial lifecycle model. In: *BMC bioinformatics*,  
428 vol. 14 BioMed Central; 2013. p. 58.
- 429 **Rodenborn B**, Chen CH, Swinney HL, Liu B, Zhang HP. Propulsion of microorganisms by a helical flagellum.  
430 *Proceedings of the National Academy of Sciences*. 2013; 110(5):E338–E347. [https://www.pnas.org/content/  
431 110/5/E338](https://www.pnas.org/content/110/5/E338).
- 432 **Sagawa T**, Kikuchi Y, Inoue Y, Takahashi H, Muraoka T, Kinbara K, Ishijima A, Fukuoka H. Single-cell E. coli  
433 response to an instantaneously applied chemotactic signal. *Biophysical journal*. 2014; 107(3):730–739.
- 434 **Sarkar MK**, Paul K, Blair D. Chemotaxis signaling protein CheY binds to the rotor protein FliN to control the  
435 direction of flagellar rotation in Escherichia coli. *Proceedings of the National Academy of Sciences*. 2010;  
436 107(20):9370–9375.
- 437 **Segall JE**, Ishihara A, Berg HC. Chemotactic signaling in filamentous cells of Escherichia coli. *Journal of  
438 bacteriology*. 1985; 161(1):51–59.

- 439 **Segel LA.** Incorporation of receptor kinetics into a model for bacterial chemotaxis. *Journal of theoretical biology.*  
440 1976; 57(1):23–42.
- 441 **Shi Y.** Adaptive Ising model and bacterial chemotactic receptor network. *EPL (Europhysics Letters).* 2000;  
442 50(1):113.
- 443 **Shi Y.** Effects of thermal fluctuation and the receptor-receptor interaction in bacterial chemotactic signaling and  
444 adaptation. *Physical Review E.* 2001; 64(2):021910.
- 445 **Shi Y.** Clustering and signalling of cell receptors. *Physica A: Statistical Mechanics and its Applications.* 2002;  
446 311(1-2):199–212.
- 447 **Shi Y, Duke T.** Cooperative model of bacterial sensing. *Physical Review E.* 1998; 58(5):6399.
- 448 **Shimizu TS, Tu Y, Berg HC.** A modular gradient-sensing network for chemotaxis in *Escherichia coli* revealed by  
449 responses to time-varying stimuli. *Molecular systems biology.* 2010; 6(1):382.
- 450 **Sourjik V, Berg HC.** Receptor sensitivity in bacterial chemotaxis. *Proceedings of the National Academy of*  
451 *Sciences.* 2002; 99(1):123–127.
- 452 **Sourjik V, Wingreen NS.** Responding to chemical gradients: bacterial chemotaxis. *Current opinion in cell biology.*  
453 2012; 24(2):262–268.
- 454 **Spudich JL, Koshland Jr DE.** Non-genetic individuality: chance in the single cell. *Nature.* 1976; 262(5568):467.
- 455 **Tagkopoulos I, Liu YC, Tavazoie S.** Predictive behavior within microbial genetic networks. *science.* 2008;  
456 320(5881):1313–1317.
- 457 **Terasawa S, Fukuoka H, Inoue Y, Sagawa T, Takahashi H, Ishijima A.** Coordinated reversal of flagellar motors on  
458 a single *Escherichia coli* cell. *Biophysical journal.* 2011; 100(9):2193–2200.
- 459 **Tindall MJ, Porter S, Maini P, Gaglia G, Armitage JP.** Overview of mathematical approaches used to model  
460 bacterial chemotaxis I: the single cell. *Bulletin of mathematical biology.* 2008; 70(6):1525–1569.
- 461 **Turner L, Ping L, Neubauer M, Berg HC.** Visualizing flagella while tracking bacteria. *Biophysical Journal.* 2016;  
462 111(3):630–639.
- 463 **Wadhams GH, Armitage JP.** Making sense of it all: bacterial chemotaxis. *Nature reviews Molecular cell biology.*  
464 2004; 5(12):1024.
- 465 **Woese CR, Fox GE.** Phylogenetic structure of the prokaryotic domain: the primary kingdoms. *Proceedings of*  
466 *the National Academy of Sciences.* 1977; 74(11):5088–5090.
- 467 **Xie L, Wu XL.** Bacterial motility patterns reveal importance of exploitation over exploration in marine microhabi-  
468 tats. Part I: Theory. *Biophysical journal.* 2014; 107(7):1712–1720.
- 469 **Yu YD, Choi Y, Teo YY, Dalby AR.** Developing stochastic models for spatial inference: Bacterial chemotaxis. *PLoS*  
470 *one.* 2010; 5(5):e10464.
- 471 **Yuan J, Berg HC.** Ultrasensitivity of an adaptive bacterial motor. *Journal of molecular biology.* 2013; 425(10):1760–  
472 1764.
